# Supplementary material for: Mediiert die schmerzspezifische Selbstwirksamkeit die Beziehung zwischen Depressivität und arbeitsbezogenen Faktoren bei nichtspezifischen chronischen Rückenschmerzen?
Source: Springer Nature journal article supplement (doi:10.1007/s00482-023-00701-0), 2023-03-09
Supplement: MOESM1 [file 24604104]

**Mediation 1:** Zusammenhang zwischen Depressivität zu Rehabilitationsbeginn und subjektiver Gefährdung der Erwerbsprognose zur 24-Monatskatamnese mit schmerzspezifischer Selbstwirksamkeit (FESS) zur 12-Monatskatamnese als Mediator sowie MPSS und experimentelle Bedingung (Kontrollgruppe vs. Interventionsgruppe) als Kovariaten ( $N=382$ )

| Prädiktor                          | Kriterium                                |       |         |                               |                                               |       |       |
|------------------------------------|------------------------------------------|-------|---------|-------------------------------|-----------------------------------------------|-------|-------|
|                                    | M (Schmerzspezifische Selbstwirksamkeit) |       |         |                               | Y (Subjektive Gefährdung der Erwerbsprognose) |       |       |
|                                    | Koeff.                                   | SE    | p       |                               | Koeff.                                        | SE    | p     |
| X (Depressivität)                  |                                          |       |         | <i>c</i>                      | 0,30                                          | 0,05  | <,001 |
| X (Depressivität)                  | <i>a</i>                                 | -0,40 | 0,04    | <,001                         | <i>c'</i>                                     | 0,08  | ,092  |
| M (FESS)                           |                                          | -     | -       | -                             | <i>b</i>                                      | -0,56 | <,001 |
| C <sub>1</sub> (MPSS) <sup>1</sup> | <i>f<sub>1</sub></i>                     | -0,36 | 0,06    | <,001                         | <i>g<sub>1</sub></i>                          | 0,08  | ,208  |
| C <sub>2</sub> (BED) <sup>1</sup>  | <i>f<sub>2</sub></i>                     | 0,18  | 0,09    | ,046                          | <i>g<sub>2</sub></i>                          | 0,07  | ,933  |
|                                    |                                          |       |         | $R_a^2 = 0,28,$               | $R_c^2 = 0,38,$                               |       |       |
|                                    |                                          |       |         | $F(3, 378) = 47,88, p < ,001$ | $F(4, 377) = 58,22, p < ,001$                 |       |       |
| Vollstandardisierter               | $\beta$                                  |       | Boot SE |                               | 95%-B-KI                                      |       |       |
| indirekter Effekt                  | 0,22                                     |       | 0,03    |                               | 0,16 - 0,28                                   |       |       |
| (ab)                               |                                          |       |         |                               |                                               |       |       |

*Anmerkungen:* MPSS = Mainzer Stadienmodell der Schmerzchronifizierung, BED = experimentelle Bedingung; Koeff.:  $\beta$ -Koeffizient, SE: Standardfehler, p: Signifikanzwert, Boot SE: Bootstrap-Standardfehler, 95%-B-KI: 95%-Bootstrap-Konfidenzintervall, <sup>1</sup>unstandardisierter b-Koeffizient.

**Mediation 2:** Zusammenhang zwischen Depressivität zu Rehabilitationsbeginn und subjektiver physischer Arbeitsfähigkeit zur 24-Monatskatamnese mit schmerzspezifischer Selbstwirksamkeit (FESS) zur 12-Monatskatamnese als Mediator sowie MPSS und experimentelle Bedingung (Kontrollgruppe vs. Interventionsgruppe) als Kovariaten ( $N=382$ )

|                                    |                      | Kriterium                                |      |          |                                           |               |      |       |
|------------------------------------|----------------------|------------------------------------------|------|----------|-------------------------------------------|---------------|------|-------|
|                                    |                      | M (Schmerzspezifische Selbstwirksamkeit) |      |          | Y (Subjektive physische Arbeitsfähigkeit) |               |      |       |
| Prädiktor                          |                      | Koeff.                                   | SE   | p        |                                           | Koeff.        | SE   | p     |
| X (Depressivität)                  |                      |                                          |      | <i>c</i> |                                           | -0,28         | 0,05 | <,001 |
| X (Depressivität)                  | <i>a</i>             | -0,40                                    | 0,04 | <,001    | <i>c'</i>                                 | -0,01         | 0,04 | ,772  |
| M (FESS)                           |                      | -                                        | -    | -        | <i>b</i>                                  | 0,66          | 0,04 | <,001 |
| C <sub>1</sub> (MPSS) <sup>1</sup> | <i>f<sub>1</sub></i> | -0,36                                    | 0,06 | <,001    | <i>g<sub>1</sub></i>                      | -0,14         | 0,06 | ,012  |
| C <sub>2</sub> (BED) <sup>1</sup>  | <i>f<sub>2</sub></i> | 0,18                                     | 0,09 | ,046     | <i>g<sub>2</sub></i>                      | 0,01          | 0,07 | ,920  |
|                                    |                      | $R_a^2 = 0,28,$                          |      |          | $R_c^2 = 0,50,$                           |               |      |       |
|                                    |                      | $F(3, 378) = 47,88, p < ,001$            |      |          | $F(4, 377) = 92,91, p < ,001$             |               |      |       |
| Vollstandardisierter               |                      | $\beta$                                  |      | Boot SE  |                                           | 95%-B-KI      |      |       |
| indirekter Effekt                  |                      | -0,26                                    |      | 0,03     |                                           | -0,32 - -0,20 |      |       |
| (ab)                               |                      |                                          |      |          |                                           |               |      |       |

*Anmerkungen:* MPSS = Mainzer Stadienmodell der Schmerzchronifizierung, BED = experimentelle Bedingung; Koeff.:  $\beta$ -Koeffizient, SE: Standardfehler, p: Signifikanzwert, Boot SE: Bootstrap-Standardfehler, 95%-B-KI: 95%-Bootstrap-Konfidenzintervall, <sup>1</sup>unstandardisierter b-Koeffizient.

**Mediation 3:** Zusammenhang zwischen Depressivität zu Rehabilitationsbeginn und subjektiver psychischer Arbeitsfähigkeit zur 24-Monatskatamnese mit schmerzspezifischer Selbstwirksamkeit (FESS) zur 12-Monatskatamnese als Mediator sowie MPSS und experimentelle Bedingung (Kontrollgruppe vs. Interventionsgruppe) als Kovariaten ( $N=382$ )

|                                    |                      | Kriterium                                |      |          |                                            |               |      |       |
|------------------------------------|----------------------|------------------------------------------|------|----------|--------------------------------------------|---------------|------|-------|
|                                    |                      | M (Schmerzspezifische Selbstwirksamkeit) |      |          | Y (Subjektive psychische Arbeitsfähigkeit) |               |      |       |
| Prädiktor                          |                      | Koeff.                                   | SE   | p        |                                            | Koeff.        | SE   | p     |
| X (Depressivität)                  |                      |                                          |      | <i>c</i> |                                            | -0,39         | 0,05 | <,001 |
| X (Depressivität)                  | <i>a</i>             | -0,40                                    | 0,04 | <,001    | <i>c'</i>                                  | -0,24         | 0,05 | <,001 |
| M (FESS)                           |                      | -                                        | -    | -        | <i>b</i>                                   | 0,38          | 0,05 | <,001 |
| C <sub>1</sub> (MPSS) <sup>1</sup> | <i>f<sub>1</sub></i> | -0,36                                    | 0,06 | <,001    | <i>g<sub>1</sub></i>                       | -0,08         | 0,07 | ,253  |
| C <sub>2</sub> (BED) <sup>1</sup>  | <i>f<sub>2</sub></i> | 0,18                                     | 0,09 | ,046     | <i>g<sub>2</sub></i>                       | 0,01          | 0,09 | ,997  |
|                                    |                      | $R_a^2 = 0,28,$                          |      |          | $R_c^2 = 0,30,$                            |               |      |       |
|                                    |                      | $F(3, 378) = 47,88, p < ,001$            |      |          | $F(4, 377) = 40,92, p < ,001$              |               |      |       |
| Vollstandardisierter               |                      | β                                        |      | Boot SE  |                                            | 95%-B-KI      |      |       |
| indirekter Effekt                  |                      | -0,15                                    |      | 0,03     |                                            | -0,21 - -0,10 |      |       |
| (ab)                               |                      |                                          |      |          |                                            |               |      |       |

*Anmerkungen:* MPSS = Mainzer Stadienmodell der Schmerzchronifizierung, BED = experimentelle Bedingung; Koeff.: β-Koeffizient, SE: Standardfehler, p: Signifikanzwert, Boot SE: Bootstrap-Standardfehler, 95%-B-KI: 95%-Bootstrap-Konfidenzintervall, <sup>1</sup>unstandardisierter b-Koeffizient.
